# Supplementary material
Source: MDPI journal article supplement (https://www.mdpi.com/2073-4344/9/7/592)
Supplement: s1 [file s1]

## Supplementary data:

**Table S1.** Details of the preparation method and concentration of K and Na (mg/l) in filtrate and washing waters.

| Step | Washing |                 | Filtration     |                |                |                |                  |                 |                |
|------|---------|-----------------|----------------|----------------|----------------|----------------|------------------|-----------------|----------------|
|      | g       | ml <sup>a</sup> | g <sup>b</sup> | g <sup>c</sup> | g <sup>d</sup> | g <sup>e</sup> | ml <sup>f</sup>  | Na <sup>g</sup> | K <sup>g</sup> |
| "1"  | 143.0   | -               | 26.6           | 5.550          | 4.5402         | 116.4          | 405 <sup>h</sup> | 670             | 33665          |
| "2"  | 116.4   | 200             | 26.9           | 4.8714         | 3.6352         | 73.6           | 225 <sup>i</sup> | 275             | 11885          |
| "3"  | 73.6    | 200             | 24.4           | 3.8408         | 2.7786         | 74.4           | 200 <sup>i</sup> | 62              | 2506           |
| "4"  | 50.3    | 200             | 21.8           | 3.9221         | 2.8419         | 41.9           | 220 <sup>i</sup> | 21              | 492            |
| "5"  | 28.5    | 200             | 17.5           | 3.6168         | 2.6207         | 17.5           | 210 <sup>i</sup> | 2               | 39             |

<sup>a</sup> added water, <sup>b</sup> wet cake for drying, <sup>c</sup> dried solid, <sup>d</sup> calcined solid, <sup>e</sup> wet cake after washing, <sup>f</sup> volume,<sup>g</sup> mg l<sup>-1</sup>, <sup>h</sup> filtrate, <sup>i</sup> washing water.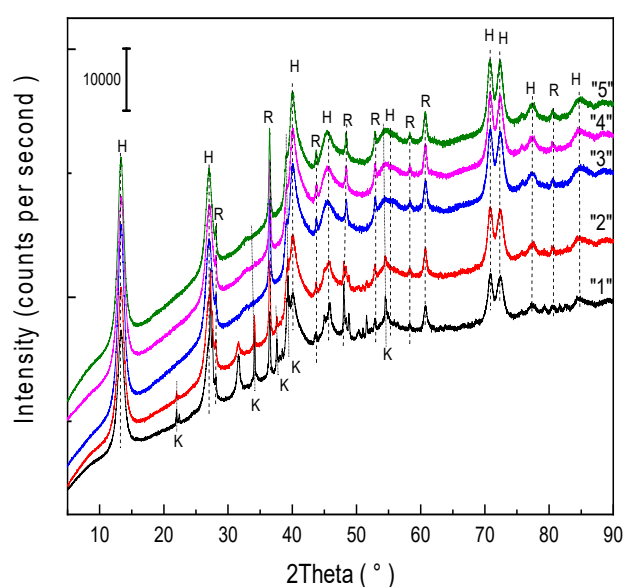**Figure S1.** Diffraction patterns of the dried K-precipitated Co-Mn-Al compounds containing various amounts of potassium. H – hydrotalcite-like compounds, R – rhodochrosite, K – KNO<sub>3</sub>.

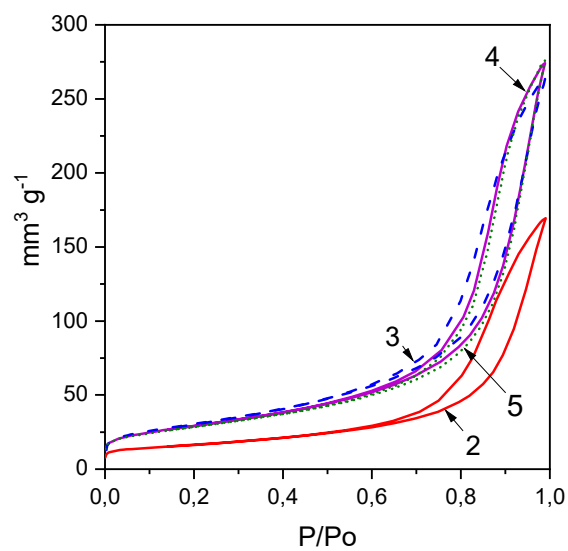

**Figure S2.** Adsorption-desorption isotherms of nitrogen for K-precipitated Co-Mn-Al mixed oxides containing various amounts of potassium in wt. %: curve 2 – 8.20, curve 3 – 2.39, curve 4 – 0.92, curve 5 – 0.60.
